# Supplementary material for: Volatility of aerosol particles from NO 3 oxidation of various biogenic organic precursors
Source: Copernicus journal article supplement (doi:10.5194/egusphere-2022-1043), 2022-10-10
Supplement: Supplementary file 1 [file egusphere-2022-1043-supplement.pdf]

# Supporting information

Table S1. Overview of the model input (apart from the volatility distributions) and diffusion volumes.

| General settings                             |                                          |      |
|----------------------------------------------|------------------------------------------|------|
| Density, $\rho$                              | ( $\text{kg m}^{-3}$ )                   | 1200 |
| Surface tension, $\sigma$                    | ( $\text{N m}^{-1}$ )                    | 0.3  |
| Diffusion coefficient, $D$                   | ( $10^{-6} \text{ m}^2 \text{ s}^{-1}$ ) | 5    |
| Temperature dependent factor for $D$ , $\mu$ | (-)                                      | 1.75 |
| Accommodation coefficient, $\alpha_m$        | (-)                                      | 1    |
| Atomic and structural diffusion volumes      |                                          |      |
| C                                            | 15.9                                     |      |
| H                                            | 2.31                                     |      |
| O                                            | 6.11                                     |      |
| N                                            | 4.54                                     |      |
| Aromatic ring                                | -                                        | 18.3 |
| Heterocyclic ring                            | -                                        | 18.3 |
| Air                                          | 19.7                                     |      |

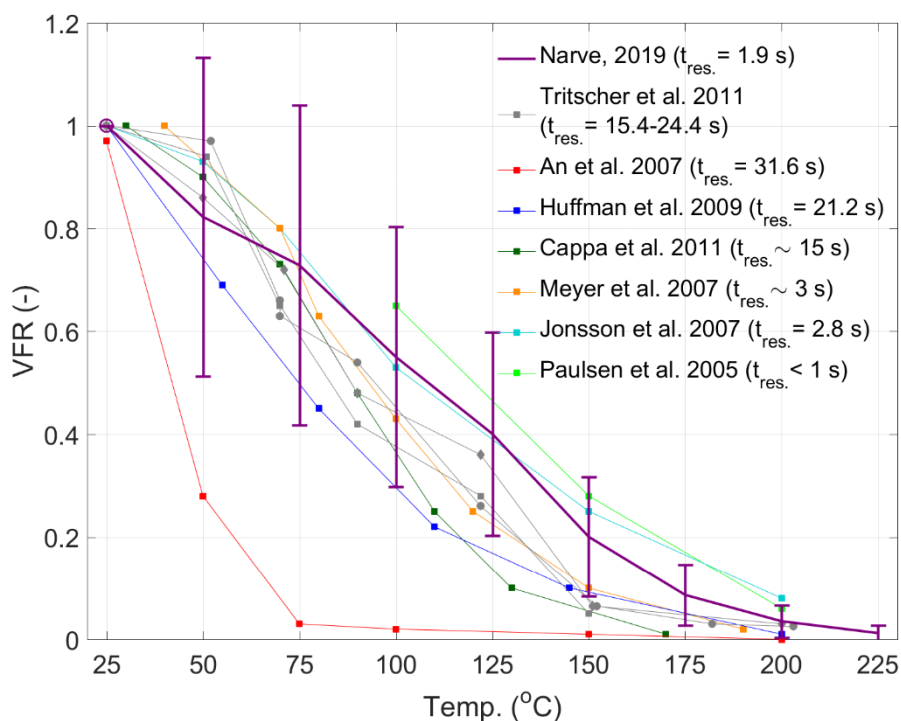

Figure S1 Measured VFRs of  $\alpha$ -pinene ozonolysis vs. temperature and comparison to literature, based on different residence times within the TD.

5

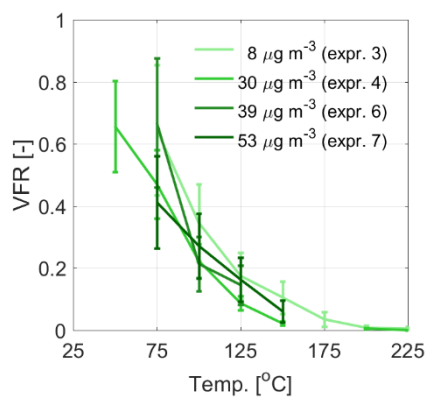

Figure S2 VFR as a function of VTDMA temperature for four different initial mass loadings from the nitrate oxidation of  $\alpha$ -pinene.

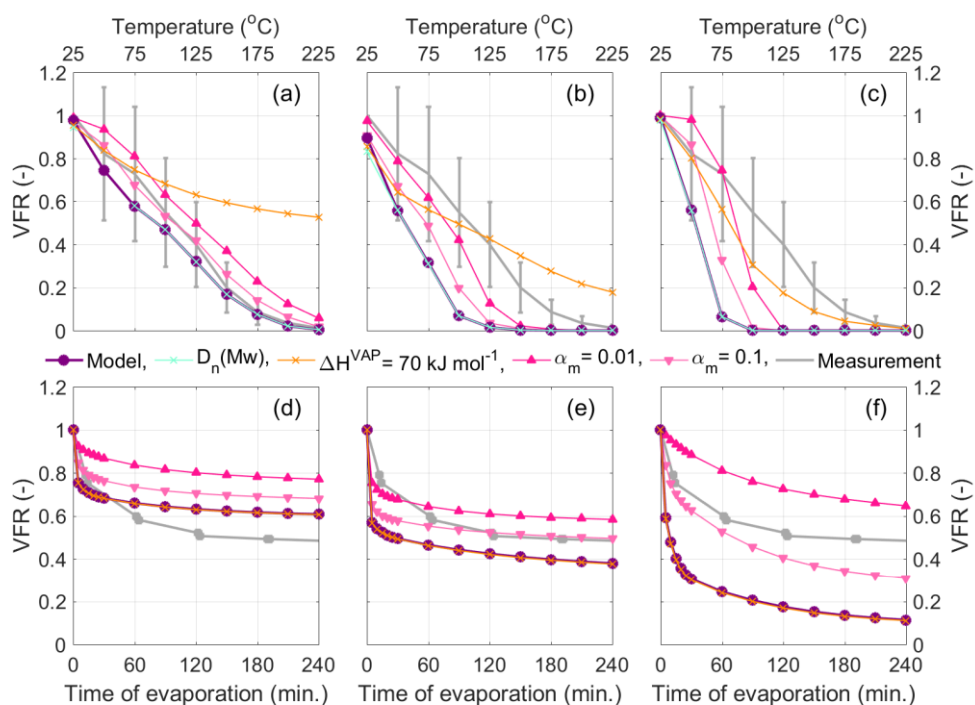

10 Figure S3. Sensitivity study based on  $\alpha$ -pinene ozonolysis with the original model output (purple) and measurements (grey), for a fixed vaporization enthalpy,  $\Delta H^{\text{VAP}} = 70 \text{ kJ/mol}$  (yellow), reduced accommodation ( $\alpha_m$ , set to be either 0.1 or 0.01 (pink)), and a mass-dependent diffusion coefficient (blue).

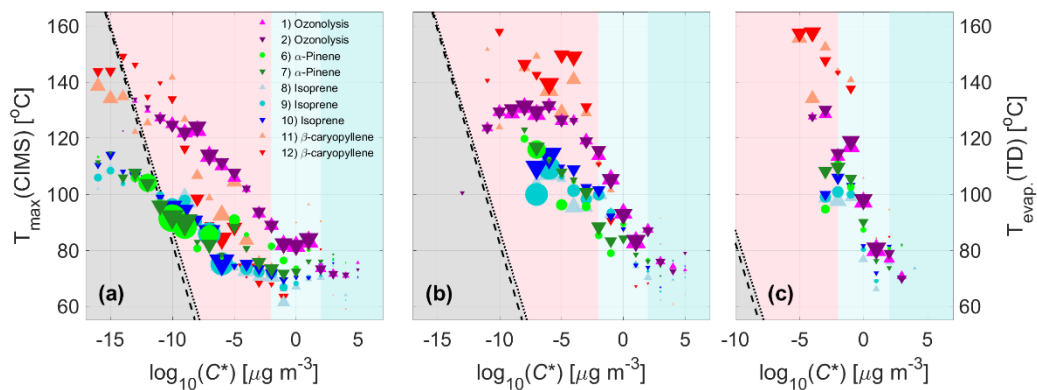

15 **Figure S4.** The TD temperatures at which 50 % (dashed line) or 99 % (dotted line) of species with a given  $C^*$  are predicted to evaporate for (a) MHR, (b) IvWA and (c) PRK according to the kinetic model. Grey shading indicates regions where the majority of the species with a given  $C^*$  are expected to be in the particle phase, and pink (+ blue) shading regions with gas phase dominating the partitioning within our VTDMA setup. The markers represent the mean maximum desorption temperature ( $T_{\max}$ ) within the FIGAERO-CIMS as a function of the  $C^*$  values for  $\alpha$ -pinene ozonolysis (purple) and the nitrate oxidation of  $\alpha$ -pinene (green), isoprene (blue) and  $\beta$ -caryophyllene (orange). The marker sizes are proportional to the mass fraction observed in the studied systems. The blue areas mark the range of  $C^*$  which is sensitive towards iso-thermal evaporation at room temperature with our
   
 20 setup, based on the results shown in Figs. 4 and 5.
