# Supplementary material for: Volatility of aerosol particles from NO 3 oxidation of various biogenic organic precursors
Source: Copernicus journal article supplement (doi:10.5194/egusphere-2022-1043), 2022-10-10
Supplement: Supplementary file [file egusphere-2022-1043-AC1-supplement.pdf]

## ***Response Letter to Referee #1***

The authors thank the reviewer for the careful review of our manuscript and helpful comments and suggestions, which significantly improved our manuscript. All the comments (in bold text) are addressed below point by point, with our response following in non-bold text and the corresponding revisions to the manuscript in blue. All updates of the original submission are tracked in the revised version.

**In their work, “Volatility of aerosol particles from NO<sub>3</sub> oxidation of various biogenic organic precursors,” the authors present a detailed examination of the volatility distributions of SOA formed through BVOC+NO<sub>3</sub> reactions. Several different experimental methods are coupled with multiple formula-based parameterizations to generate a full picture of the distribution. In general, it is a very thorough and nice work, with cohesive conclusions and well-written presentation. NO<sub>3</sub> chemistry is an important and understudied topic, and there are some very interesting results here.**

**The formula-based vapor pressure parameterization approach used in this work is a topic with which I have some very specific expertise and interest, and I believe there are some specific major aspects that need to be re-examined, as discussed below. I do not think they will be hard to incorporate, but they will require some major revisions.**

We thank the reviewer for the positive assessment of our manuscript. We are also thankful for offering to help with the implementation.

**(1) I don’t think that the parameterization implemented in this work should be referred to as IvWA (also, I usually use an uppercase “V”). What is being implemented here is the Li et al. method, with modifications implemented as suggested by Isaacman-VanWertz and Aumont. The distinction being that we did not develop the coefficients or approach being used. Based on the best available structure-based estimation techniques, our proposed parameterization was actually to use the average of the modified Li method with the Daumit method, which is not included in the present work but relies heavily on SIMPOL like the Donahue and subsequent Mohr methods do. Modified Li et al. alone was shown to be higher volatility than the best structure-based estimation techniques, while Daumit (SIMPOL) tends to be lower. The average method is what is recommended by the PEACH scripts published as part of Isaacman-VanWertz and Aumont. I have actually updated PEACH to include the Mohr formulation am happy to send it along; I will update the git repository as soon as I get a chance, sorry it was not included in the first version.**

We thank the reviewer for clarifying the difference between the parameterization by Li, et al. (2016) and by Isaacman-VanWertz and Aumont (2021). We change now the naming of “IvWA” to “Li”. We also thank the reviewer for suggesting to include the structure-based parameterization by Daumit, et al. (2013), as well as the average of the modified Li method and the Daumit method. We tested both and decided to add an updated modified version of the Daumit method which includes a term for nitrate functional groups in our manuscript, which is a very good addition. We added it in Methods (see text marked blue below), updated the Figs 3 and 4 as well as the discussion in the revised manuscript.

“2) an updated version of Daumit et al. (2013) with a nitrate group contribution term:

$$\log_{10} C^* = \log_{10} \alpha + b_0 + b_C n_C + b_{=O} n_{=O} + b_{-OH} n_{-OH} + b_{-NO_3} n_{-NO_3} \quad (\text{Eq. 4})$$

Where  $\alpha = 10^6(MW)/RT$  (conversion factor), the  $b$  terms are the different group contribution terms for quantifying the contribution of each chemical moiety to the saturation vapor pressure:  $b_0$  is the zero order term,  $b_C$  is the carbon number term,  $b_{=O}$  is the carbonyl group term,  $b_{-OH}$  is the hydroxyl group term, and  $b_{-NO_3}$  is the nitrate group term (for  $MW = 200 \text{ g mol}^{-1}$  and  $T = 293 \text{ K}$ , equal to 1.79, -0.438, -0.935, -2.23 and -2.23, respectively). Here, we assume all nitrogen atoms are from nitrate groups, i.e.  $n_N = n_{-NO_3}$ .

We modified the parameterization from Daumit et al. (2013) by including nitrate groups. Functional groups in the molecules are thus limited to carbonyls, hydroxyls, nitrates, or some combination of the three. A carbonyl or a hydroxyl group contains one oxygen atom, and a nitrate group contains three oxygen atoms, thus:

$$n_O = n_{-OH} + n_{=O} + 3 * n_{-NO_3} \quad (\text{Eq. 5})$$

The level of unsaturation (double bound equivalent, DBE) arises from carbonyl groups and nitrate groups (the double bonds in the carbon chain of the precursor have reacted). Since a nitrate group has a degree of unsaturation of 1,

$$n_{=O} = \text{DBE} - n_{-NO_3} = n_C - \left(\frac{n_H}{2}\right) + \left(\frac{n_N}{2}\right) + 1 - n_N = n_C - \left(\frac{n_H}{2}\right) - \left(\frac{n_N}{2}\right) + 1 \quad (\text{Eq. 6})$$

Based on Eqs 4, 5 and 6, the number of hydroxyl groups can be calculated as:

$$n_{-OH} = n_O - n_{=O} - 3 * n_N = n_O - n_C + \left(\frac{n_H}{2}\right) - \left(\frac{5n_N}{2}\right) - 1 \quad (\text{Eq. 7}),$$

from which the modified Daumit parametrization follows as

$$\log_{10} C^* = \log_{10} \alpha + b_0 + b_C n_C + b_{=O} \left( n_C - \left(\frac{n_H}{2}\right) - \left(\frac{n_N}{2}\right) + 1 \right) + b_{-OH} \left( n_O - n_C + \left(\frac{n_H}{2}\right) - \left(\frac{5n_N}{2}\right) - 1 \right) + b_{-NO_3} n_N \quad (\text{Eq. 8})$$

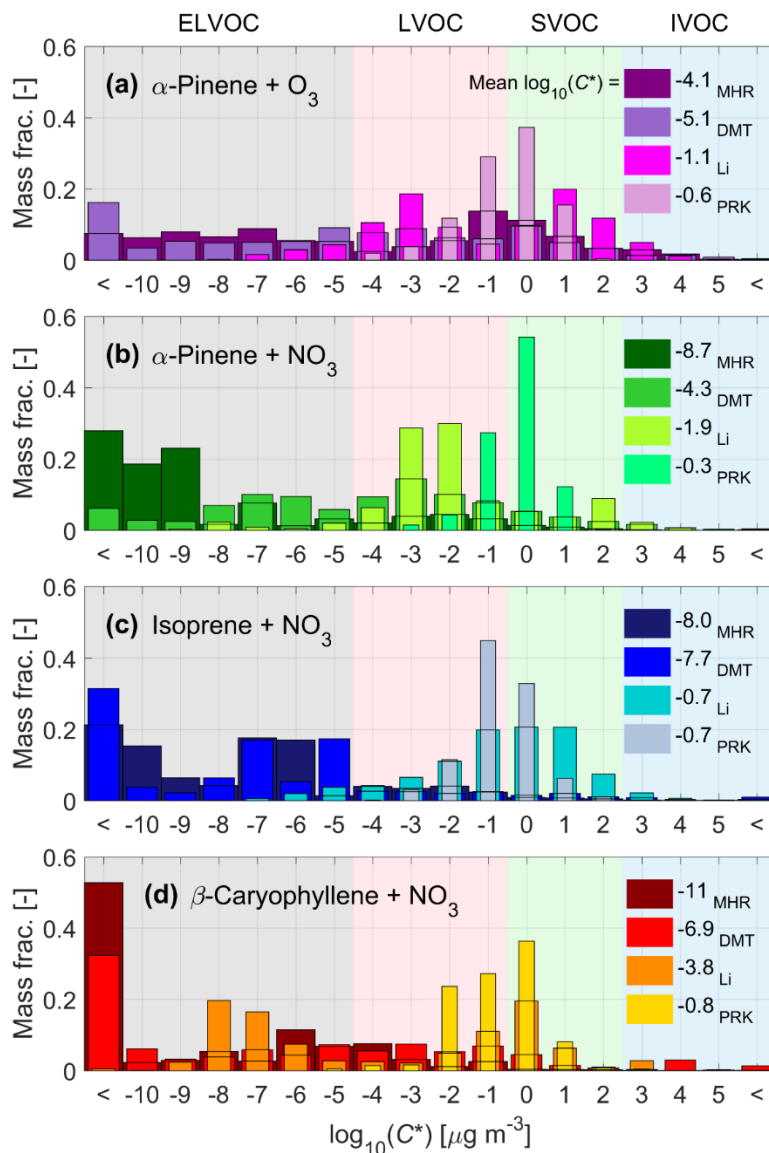

**New Figure 3. Volatility distributions in the form of VBS as derived from the molecular composition for  $\alpha$ -pinene ozonolysis (a) and nitrate oxidation of  $\alpha$ -pinene (b), isoprene (c) and  $\beta$ -caryophyllene (d). The four volatility parameterizations used (MHR: Mohr et al., 2019; DMT: modified Daumit et al., 2010; Li: modified Li et al., 2017; PRK: Peräkylä et al., 2020) are depicted with different shades of the main color for each of the precursors. The averaged  $\log(C^*)$  for each parameterization is also listed in the legend.**

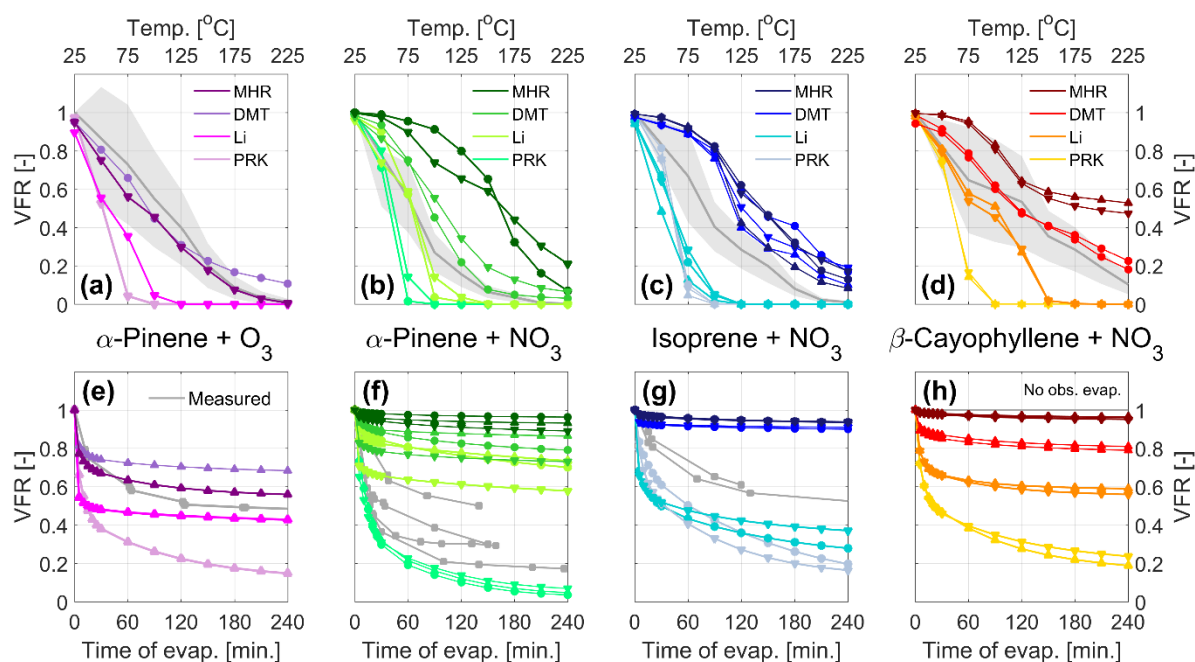

**New Figure 4. Evaporation in the TD (upper row) and isothermal evaporation chamber (lower row) predicted by the kinetic model using the VBS from Fig. 3 as input for  $\alpha$ -pinene ozonolysis and nitrate oxidation of  $\alpha$ -pinene, isoprene and  $\beta$ -caryophyllene. The symbols ( $\blacktriangle$  $\bullet$  $\blacktriangledown$ ) mark the experiments in chronological order, as indicated in Table 1, during which the VBS data were collected. For comparison, the experimental VFR data are displayed in grey, with the shaded areas displaying the uncertainty of the VTMDA measurement.**

“The volatility distributions in the form of VBS resulting from the parameterizations by Mohr et al. (2019), modified Daumit et al. (2013), modified Li et al. (2016), and Peräkylä et al. (2020) (hereafter referred to as MHR, DMT, Li and PRK, respectively) are presented in Fig. 3 for all the studied chemical systems, including  $\alpha$ -pinene ozonolysis. PRK produces the highest volatilities, followed by Li, with MHR resulting in the least volatile compounds for all nitrate systems and DMT resulting in the least volatile compounds for the  $\alpha$ -pinene ozonolysis system. The volatility distributions from MHR, DMT and Li tend to contain a wider range of  $C^*$  values, while the volatility distributions by PRK are narrower and generally unimodal; the same trend can be observed for all the four systems.”

“The DMT parameterization also predicts a broad range of volatility, similar to MHR. It predicts more ELVOC for the ozonolysis system, with a mean  $\log_{10}(C^*)$  of -5.2, which is lower than the mean  $\log_{10}(C^*)$  of -4.2 by MHR. However, for all nitrate systems, it predicts significantly less ELVOC than MHR, and the mean  $\log_{10}(C^*)$  is also higher than that by MHR.”

“The calculated evaporation of SOA from  $\alpha$ -pinene ozonolysis (Fig. 4, first column) using MHR reproduces the evaporation well, while DMT leads to higher VFR than the observation, and the other two parameterizations, Li and PRK, result in lower VFR compared to the measurements. The overall performance is consistent for both VTMDA and isothermal evaporation data, i.e. MHR reproduces the evaporation best, DMT overestimates VFR, and the other two methods underestimate VFR.”

“For the nitrate systems, MHR, in contrast to its good performance for the ozonolysis system, results in too high VFR compared to what is measured with the VTMDA (Fig. 4b, c, and d) and the isothermal evaporation chamber (Fig. 4f and g). PRK, which results in highest volatility

(Fig. 3), underestimates the VFR for all cases. The VFR estimates using Li and DMT fall in between. DMT tends to overestimate, and Li tends to underestimate the VFR with the VTDMA (Fig. 4 b, e and d). We simulated the VFR using averaged Li and DMT values in Fig. S7 and it works well for the  $\alpha$ -pinene and isoprene systems but not the  $\beta$ -caryophyllene system. For simulating the VFR with the isothermal evaporation chamber, their performance is different and depends on individual systems: DMT and Li both overestimate the VFR for the  $\alpha$ -pinene system; DMT overestimates the VFR and Li underestimates the VFR for the isoprene system; both underestimate the VFR for the  $\beta$ -caryophyllene system.”

“When used as input to a kinetic model, the VBS predicted by Mohr et al. (2019) reproduced the evaporation of  $\alpha$ -pinene ozonolysis generated SOA most accurately out of the four parameterizations. However, when simulating the evaporation of the nitrate-initiated SOA, no parameterization performed perfectly for all three systems. The Mohr et al. (2019) parameterization was found to generally substantially under-predict the volatility and evaporation for all three precursors, while the Peräkylä et al. (2020) parameterizations generally over-predicted the volatility and evaporation for all the systems, and the modified Li et al. (2016) and modified Daumit et al. (2013) were in between. This warrants a thorough re-evaluation of the parameter describing the magnitude of the vapor pressure reduction due to nitrogen-containing functional groups.”

**(2) I would recommend trying the combined Li-Daumit method (which I would not object to being cited as IVWA, as it is a somewhat different approach than either alone). As noted above, it does the best job of mapping structure-based vapor pressure estimates onto formulas. This of course does not provide any information about how accurate the actual estimates are, which is a nice aspect of the present work, but it would still probably be the best parameterization to use for formulas. Below I have included comparison figures of the Mohr method with the modified Li method (essentially, the IvWA method in this work, though see comment 3 below), the Daumit method, and the Li-Daumit average recommended by Isaacman-VanWertz and Aumont. For comparison, the ~1200 formulas generated in Isaacman-VanWertz and Aumont are used, values are vapor pressure in units of atm (to convert to C\* easily, just add roughly 9.5 orders of magnitude).**

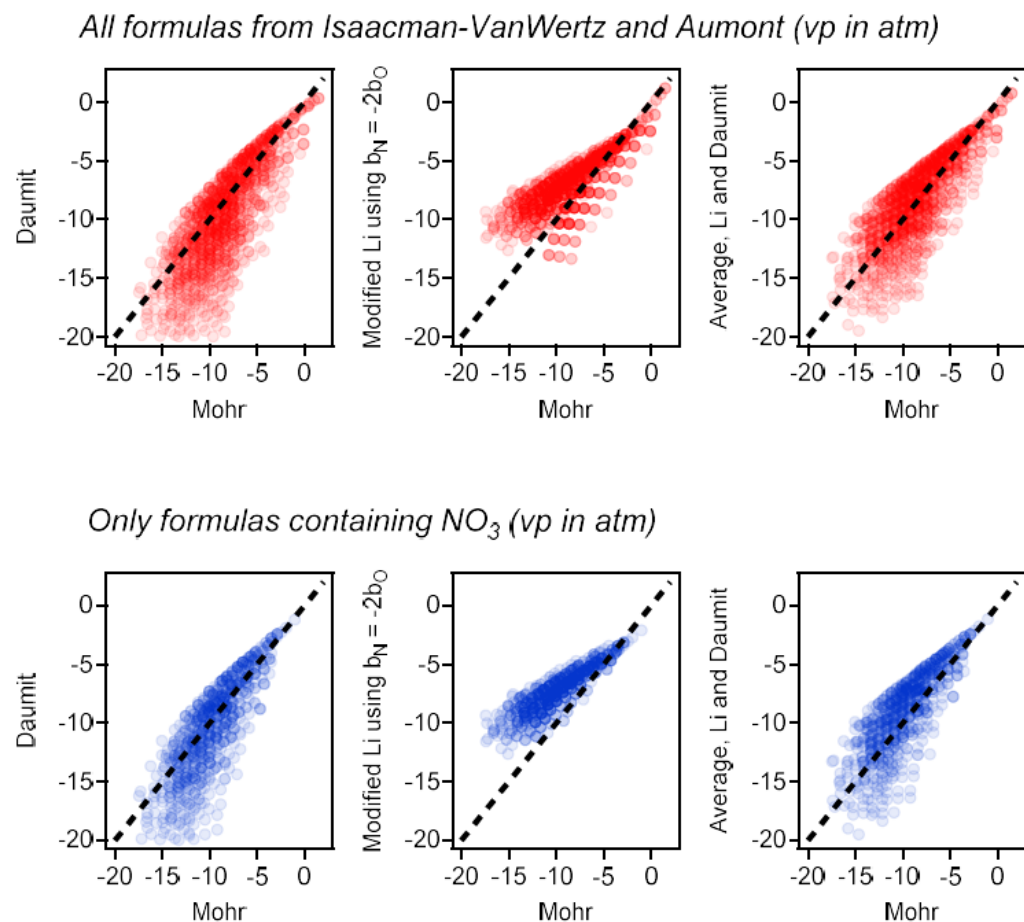

**Figure RC1.** Comparison of vapor pressures estimated for 1200 formulas using four parameterizations: Mohr et al. (“MHR” in manuscript), Modified Li et al. (“IvWA” in manuscript), Daumit et al., and average Li-Daumit (recommended by Isaacman-VanWertz and Aumont, using other Li modification, see comment 3). Values are in units of atm.

Generally, the Daumit method, which is based in part on SIMPOL coefficients like the Mohr method, is broadly near agreement with the Mohr method, while the modified Li method tends to predict higher vapor pressures because it is tuned to values from the EPI suite vapor pressure estimator, which tends to be higher than other methods. These features of the methods are consistent with the observations in the present work. IvWA is found to be generally too volatile, consistent with the known high-volatility tendency of the Li method, and the Mohr method is often found to be a bit too low volatility, consistent with the Daumit method that is similarly based on SIMPOL (and the tendency of SIMPOL to predict lower volatilities than other methods).

The average Li-Daumit method is somewhat in between of course. Given that this method best captures structure-based estimates and might correct for some of the other methods in the present work, I would strongly suggest considering including it in the comparisons. As currently written, a lot of the results can be explained by the estimation methods, not inherently by the fact that the formula-based approaches implicitly ignore structure or by errors in the best available estimation methods. If Li-Daumit still fails (and it will, I’m sure, we’re just not that good at these estimations yet), we could better probe our

capabilities of estimating these properties (Do we need structure? Or is even our structure-based estimation not good enough? See comment 5).

We appreciate the reviewer sharing the thoughts and the work of comparing the Mohr method with the modified Li, the Daumit and the average of the modified Li and the Daumit methods. It is very interesting to see from Figure RC1 that the difference between the Daumit and the Mohr method become bigger for the low-volatility compounds, and that the Daumit method estimates lower volatilities of compounds with  $\log C^*$  between -20 and -10 using the Mohr method. It is consistent with our finding shown in the new Fig. 4a and 4e, and it explains very well why the Daumit method works less well than the Mohr method for the  $\alpha$ -pinene + O<sub>3</sub> system. However, it is different for the nitrate systems. The Daumit method estimates much less ELVOC (new Fig. 3), and does a better job to estimate the VFR than the Mohr method (new Fig. 4).

From the new Fig. 4, we see that DMT tends to overestimate, and Li tends to underestimate the VFR in comparison with the VTDMA, thus the average Li-Daumit method will give the best estimation for the  $\alpha$ -pinene + NO<sub>3</sub> and isoprene + NO<sub>3</sub> systems, but not for the  $\beta$ -caryophyllene + NO<sub>3</sub> system (see new Fig. S7 below). However, as both DMT and Li overestimate the VFR with the isothermal evaporation chamber for the  $\alpha$ -pinene + NO<sub>3</sub> system and both underestimate the VFR for the  $\beta$ -caryophyllene + NO<sub>3</sub> system, the average Li-Daumit method would not improve the performance for these cases. To show the different performances of individual parameterizations, and meanwhile to keep Fig. 4 still readable, we decided to only add the modified Daumit method to the main manuscript.

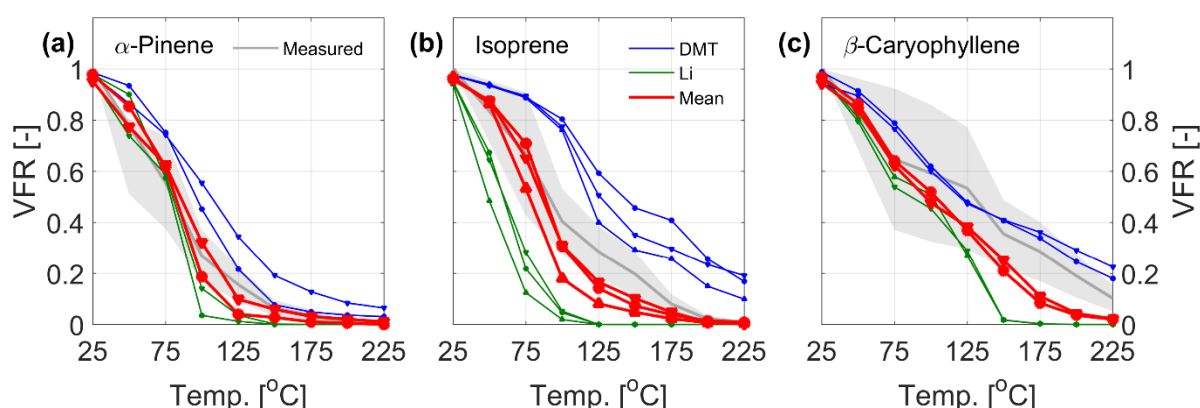

Figure S7. Comparison of the evaporation in the VTDMA system for the DMT (blue) and Li (green) methods, as well as their average (red).

(3) I have a few minor concerns about how the modifications to Li et al. suggested by Isaacman-VanWertz and Aumont are actually presented, particularly in the discussion of the treatment of NO<sub>3</sub>. I find the formulation and discussion of Equation 4 a little confusing. What we originally proposed was  $bN = -2bO$ , with a different formulation of the actual equation (i.e., no subtraction term in the oxygen count). Using Equation 4 as written with  $bN = bO$  is mathematically equivalent, but it is somewhat confusing because a reader may not realize the difference in the equation and may be confused by the two different equivalencies of  $bN$ , especially given that you cite our work directly after stating  $bN = bO$ . I think it would be less confusing to keep the original Li formula and use  $bN = -2bO$ .

Similarly, I don't really agree with citing our work after the statement on line 194 that NO<sub>3</sub> "thus reduces a compound's vapor pressure by 0.7732 orders of magnitude" – our



work was agnostic to the magnitude of the decrease in vapor pressure, we simply noted that an NO<sub>3</sub> group is equivalent to an OH group in SIMPOL so should be able to be treated as such, as is done in the Mohr method.

The magnitude of the effect, i.e., the coefficients, is defined by the model treatment of O in Li et al. (which is generally higher volatility as noted above). A similar issue arises on line 399, though if you referenced the method as a modified Li method I would not object to the characterization. Note also, we actually proposed two different possible treatments of NO<sub>3</sub> – either directly setting  $b_N = -2b_O$  as implemented in this work, or programmatically changing each NO<sub>3</sub> unit within the formula to an OH unit. In Isaacman-VanWertz and Aumont, we could not clearly establish either as better than the other and they both removed the apparent bias and are based on the same idea ( $b_{NO_3} = b_{OH}$ ). However, there is interestingly some difference, with the coefficient approach being used here yielding slightly higher vapor pressures than the conversion approach, see figure below of the 1200 formulas used in Isaacman-VanWertz and Aumont. I have included both approaches in the updated PEACH scripts that will be uploaded shortly.

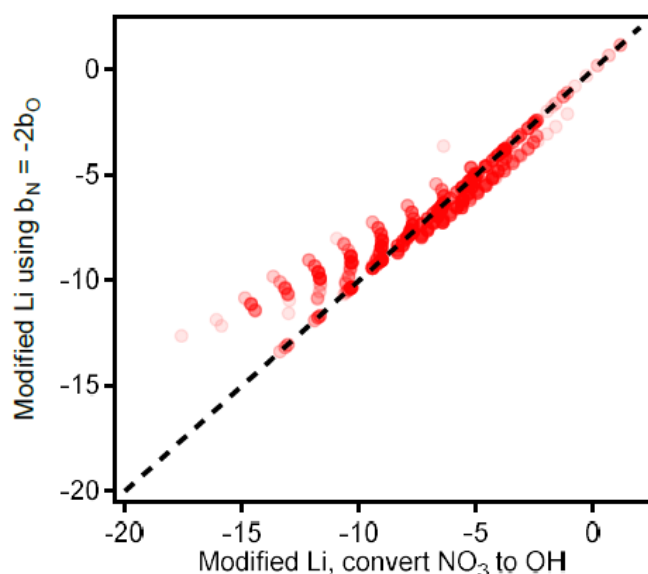

**Figure RC2.** Comparison of vapor pressures estimated for 1200 formulas using two modifications to Li et al., one based on modified coefficients (“IvWA” in manuscript) and one changing NO<sub>3</sub> units to OH (used by PEACH in average Li-Daunit method). Values are in units of atm. Modified Li using  $b_N = -2b_O$

The focus of this paper is organic nitrates, and we would like to clearly see the impacts of nitrate functional groups also in the equations. We think using  $b_N = -2b_O$  is not as clear as the mathematically equivalent Eq. 9 in the revised manuscript, and would therefore prefer to keep the equation as is:

$$\log_{10} C^* = (n_O - n_C)b_C - (n_O - 3n_N)b_O - 2 \frac{n_C n_O}{n_C + n_O} b_{CO} - n_N b_N$$

With new Eq. 9, the NO<sub>3</sub> group is clearly separated from the other functional groups containing oxygen atoms, and  $b_N (b_{-NO_3}) = b_O (b_{-OH})$ . In particular, when we tune this parameterization for NO<sub>3</sub> systems, we just want to tune the  $b_N$  value, rather than the treatment to other functional



groups containing oxygen atoms ( $b_O$ ). Due to the same reason, we didn't present the second method (converting  $-\text{NO}_3$  to  $-\text{OH}$ ) for the modified Li and the modified Daumit methods. However, we do agree to delete "thus reduces a compound's vapor pressure by 0.7732 orders of magnitude ( $b_N = b_O$  (Isaacman-VanWertz and Aumont, 2020)).", as suggested.

We also thank the reviewer for bringing up the differences induced by the two modifications (Figure RC2). On the one hand, it is not surprising because without converting  $-\text{NO}_3$  to  $-\text{OH}$  the  $b$  values are obtained by optimization using a database containing CHON compounds, while by converting  $-\text{NO}_3$  to  $-\text{OH}$ , the  $b$  values are from a database containing CHO compounds. On the other hand, it also hints at differences in the "actual"  $b$  values for  $-\text{OH}$  and  $-\text{NO}_3$ .

**(4) In Figure 3, the three parameterizations are compared. It would be nice to see how these compare the VBS derived from the FIGAERO-CIMS distribution. In later figures, the parameterizations are compared to the TD and isothermal results, but there is no real comparison to the FIGAERO results, which could maybe be used as a sort of "truth". It would actually be interesting to try to tune a Li-like method that uses all the FIGAERO-CIMS thermograms to actually tune the coefficients. This thought is implicit in the efforts to tune  $b_N$  by precursor (around line 420) - no single value works, but maybe there is a value that considers the CO interaction and maybe even some additional term.**

Thank you for this comment. Indeed, the thermograms of individual ions from the desorption in the FIGAERO-CIMS provide another means to assess volatilities. As we have shown earlier, e.g. in a previous publication on this dataset (Wu, et al. 2021), especially for complex mixtures the quantitative assessment of  $C^*$  is challenging using FIGAERO-CIMS thermograms, to say the least. We therefore slightly disagree with the reviewer's statement of using the FIGAERO thermograms as a sort of "truth". Schobesberger, et al. (2018) have developed a model framework to reproduce the shape of FIGAERO-CIMS thermograms largely based on the Hertz-Knudsen equation (Cappa, et al. 2007; Hertz 1882). The geometry of the FIGAERO inlet is far more complex than the TD, and the evaporation of compounds from the gradually heated filters includes more complex kinetic processes than e.g., the corresponding evaporation within a TD setup, which would at present add a large uncertainty in the interpretation of the thermograms.

Whereas this model could potentially be used to find  $C^*$  of a certain compound via tuning the modelled to the measured thermogram shape, Schobesberger, et al. (2018) also discuss uncertainties related to the fact that several solutions may be possible to reproduce a certain thermogram. This is especially relevant for multi-component systems and for compounds where no initial guesses for  $C^*$  are available from the literature. Using the results from the different parameterizations might provide such initial guesses, of course. We feel like the extensive analysis that would be required to fully explore the parameterization – thermogram relationship is beyond the scope of this paper, but presents an interesting option for a new study.

In Fig. AC2, we plot the maximal desorption temperature ( $T_{\text{max}}$ ) of the individual compounds observed with the FIGAERO and compare the  $T_{\text{max}}$  to the predicted evaporation temperature in TD at which 50 % and 99 % of compounds should evaporate according to the kinetic model. It shows clearly the differences in the evaporation with the FIGAERO and TD. Using calibration standards for extracting vapor pressure of measured compounds (Bannan, et al. 2019) might be another option, but we haven't done such calibration during the experiments.

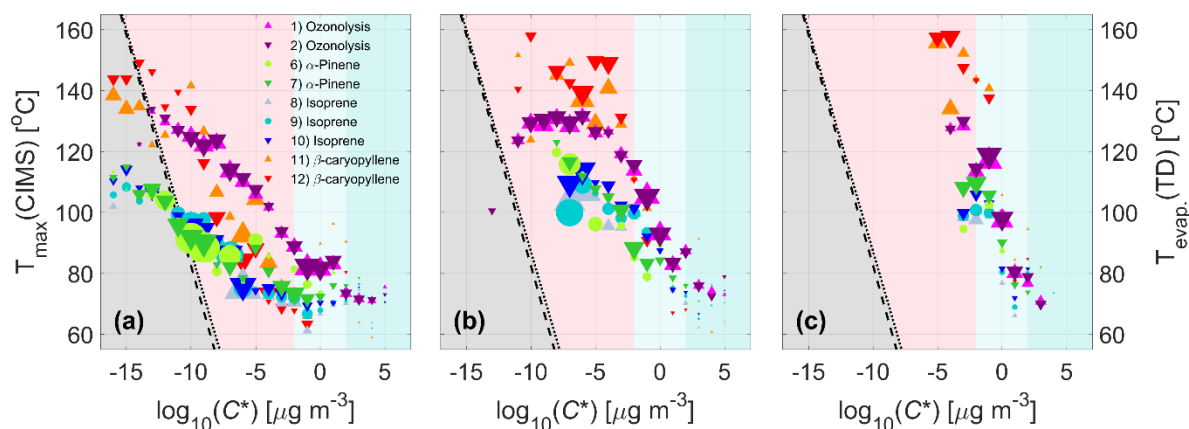

Fig. AC2. The TD temperatures at which 50 % (dashed line) or 99 % (dotted line) of species with a given  $C^*$  are predicted to evaporate for (a) MHR, (b) Li and (c) PRK according to the kinetic model. Grey shading indicates regions where the majority of the species with a given  $C^*$  are expected to be in the particle phase, and pink (+ blue) shading regions with gas phase dominating the partitioning within our VTDMA setup. The markers represent the mean maximum desorption temperature ( $T_{\max}$ ) within the FIGAERO-CIMS as a function of the  $C^*$  values for  $\alpha$ -pinene ozonolysis (purple) and the nitrate oxidation of  $\alpha$ -pinene (green), isoprene (blue) and  $\beta$ -caryophyllene (orange). The marker sizes are proportional to the mass fractions observed in the studied systems. The blue areas mark the range of  $C^*$  which is sensitive towards iso-thermal evaporation at room temperature with our setup, based on the results shown in Figs. 4 and 5 in the original manuscript.

(5) Line 402 is an interesting point, that the strengths of these methods depend on their tuning. PRK is tuned for this, so of course it works. The others are tuned more generally, so they are more widely applicable, but maybe less accurate. See comment 4 above. With that in mind that maybe we can find a more universal tuning, it would have been nice to see a little more in-depth dive into why these parameterizations do or don't capture different systems. Implicit in parameterizations is that each atom is associated with specific functional groups, so is this telling us something about differences in functionalities between systems? Do you see some formulas that desorb from FIGAERO at very different temperatures in each system? If so, that implies it is differences in structure that cannot be captured by formula alone. Or is it rather that formulas of some systems are being well represented and captured but other systems the formulas are different and are not being captured. For example, why do the parameterizations invert the volatility of the O3 and NO3 systems, is it just the volatility of NO3 groups or are there other functionality differences contributing (e.g., do the distributions of their non-NO3 components show the same inversion, or are they captured reasonably?)? These different possible outcomes would help answer the question of whether the issue in our vapor pressure estimation is that structural information is necessary (and inherently unavailable in MS data) or that our actual structure-based estimation methods are still not correct.

All of this is related to comment 4 above, using the FIGAERO data to probe what these parameterizations are actually telling us. If the authors are not interested in this problem, let me know, I would be happy to play with it if they would share the data. In general, I think the present data provide a great opportunity to understand and improve these parameterizations, but I'm not sure it is being done in this work or if the authors intend to examine this in the future.

**All these comments above will have effects on discussion and figures throughout Sections 3.3 and 3.4, so I have not provided too much additional discussion or comments on these sections here.**

The reviewer has brought up a very good question: whether structural information is necessary for estimating vapor pressure. We think the answer is, very clearly, yes. This is why e.g., in Mohr, et al. (2019), the  $b_O$  value was tuned for -OOH functional groups rather than the -OH and =O functional groups for HOMs, and why e.g. in Isaacman-VanWertz and Aumont (2021), the  $b_N$  values are adjusted to be the same as of -OH to better represent -NO<sub>3</sub> functional groups, rather than amines and amides etc. This could also be the reason why in our study MHR works better for the ozonolysis system, but DMT works better for the nitrate systems. Considering that the nitrate group contribution term in two methods is similar and the  $b_N$  value is also similar (-2.5 in the Mohr method, and -2.23 in the Daumit method), the way how these two parameterizations treat other functional groups must play a role. The Daumit method assumes all oxygen atoms except those from -NO<sub>3</sub> are from -OH, =O functional groups, while the Mohr method was tuned for -OOH functional groups and the  $b_O$  (=0.2) is much smaller than  $b_{-OH}$  (= -2.23) and  $b_{=O}$  (= -0.935) in DMT. It is possible that  $\alpha$ -pinene + O<sub>3</sub> system has more -OOH and  $\alpha$ -pinene + NO<sub>3</sub> system has more -OH and =O. However, we cannot exclude potential impacts from e.g. the carbon-carbon interaction term ( $b_C$ ) and the carbon-oxygen nonideality ( $b_{CO}$ ), as these two systems also have different carbon and oxygen numbers.

We added some discussion in the revised manuscript:

“...the parameterizations. The MHR and Daumit parameterizations are similar in the  $b_N$  values but different in the way they treat other functional groups containing oxygen atoms. The Daumit method assumes all oxygen atoms except those from -NO<sub>3</sub> are from -OH and =O functional groups, while the Mohr method was tuned for -OOH functional groups and the  $b_O$  (=0.2) is much smaller than  $b_{-OH}$  (= -2.23) and  $b_{=O}$  (= -0.935) in DMT. As MHR works better for the  $\alpha$ -pinene + O<sub>3</sub> system and DMT works better for the  $\alpha$ -pinene + NO<sub>3</sub> system, it is possible that the  $\alpha$ -pinene + O<sub>3</sub> system has more -OOH and the  $\alpha$ -pinene + NO<sub>3</sub> system has more -OH and =O.”

In Fig AC3,  $T_{max}$  of the compounds with the same molecular formula and from two different systems (isoprene + NO<sub>3</sub> and  $\alpha$ -pinene + NO<sub>3</sub>) are shown. Clearly, if they have the same/a similar structure (e.g. C<sub>10</sub>H<sub>15</sub>NO<sub>3+n</sub>), their  $T_{max}$  should be similar given similar experimental conditions, while very different structures (e.g. C<sub>10</sub>H<sub>16</sub>N<sub>2</sub>O<sub>6+n</sub>) could lead to very different  $T_{max}$ . However, such common compounds are not ubiquitous, as isoprene,  $\alpha$ -pinene,  $\beta$ -caryophyllene have different carbon numbers, and numbers of double bonds. Thus, an overall check of functional groups for different systems based on FIGAERO thermograms is not possible. As we didn't have enough information about structure and then to distinguish the different functional groups, the question “whether our actual structure-based estimation methods are still not correct” is beyond the scope of this paper.

We are, however, happy to share the experimental data and will make it publicly available through the Bolin Centre database for the final version of the manuscript. We look forward to any further insights stemming from this dataset.

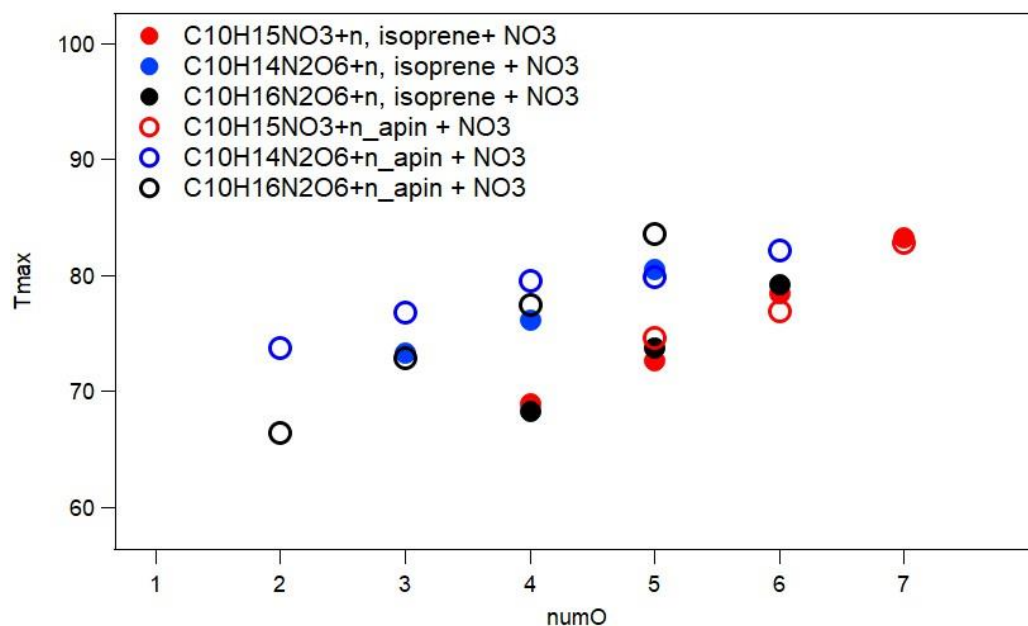

Fig. AC3 Maximum desorption temperature ( $T_{max}$ ) of compounds from isoprene + NO<sub>3</sub> and  $\alpha$ -pinene + NO<sub>3</sub> experiments. numO is the number of oxygen atoms from other functional groups than nitrate groups.

#### Technical comments.

**Overall, the paper is very nicely written, I have very few detailed technical comments.**

**Line 57: “number of studies...are much fewer” is not grammatically odd. Should be “number of studies...is lower” or “there are many fewer studies”**

Thank you. The original sentence “The number of studies on NO<sub>3</sub> oxidation of biogenic VOCs (BVOCs) are much fewer” is revised to “**There are much fewer studies on NO<sub>3</sub> oxidation of biogenic VOCs (BVOCs)**”.

**Line 70: I’m not sure the connection between the low-volatility of ON-containing HOMs and the 2.5 order drop from NO<sub>3</sub> follow from one another. I understand the connection the authors are pointing towards, but that same drop is true of OH groups, and there are plenty of SVOC and high volatility alcohols. Assuming the 2.5 orders is correct, it takes a combination of functional groups to get to (E)LVOC.**

The reviewer is absolutely right that for HOMs containing nitrate groups, not only nitrate groups but also other functional groups lower the volatility. However, one nitrate group contains three oxygen atoms, which, if they came from other functional groups, could be equal to 3 -OH or =O, or 1.5 -OOH groups. Thus, we think if these HOMs with nitrate groups fall within the category of ELVOC, the drop in their volatility due to the nitrate group must be rather big, and 2.5 is a reasonable value.

#### **Line 106-108: Run-on sentence**

The original sentence is revised to “**In the O<sub>3</sub> experiments, O<sub>3</sub> was generated by photolysis of air. Similar to the NO<sub>3</sub> experiments, the chamber was first humidified and then O<sub>3</sub> and  $\alpha$ -pinene with the desired levels were added to the chamber volumetrically.**”

#### **Line 206: Needs a comma before “referred”**

Accepted.

### Line 260-262: A bit of a complicated/run-on sentence

The original sentence is revised to “The VTDMA plots (Fig. 1a) show that particles formed through nitrate oxidation consistently display a lower VFR at given temperatures than the particles from ozonolysis, hence have higher bulk volatility.”

### Figure 2: $\alpha$ -Pinene data is pretty hard to see, maybe use a darker green

We changed the  $\alpha$ -pinene colour to grey in the background.

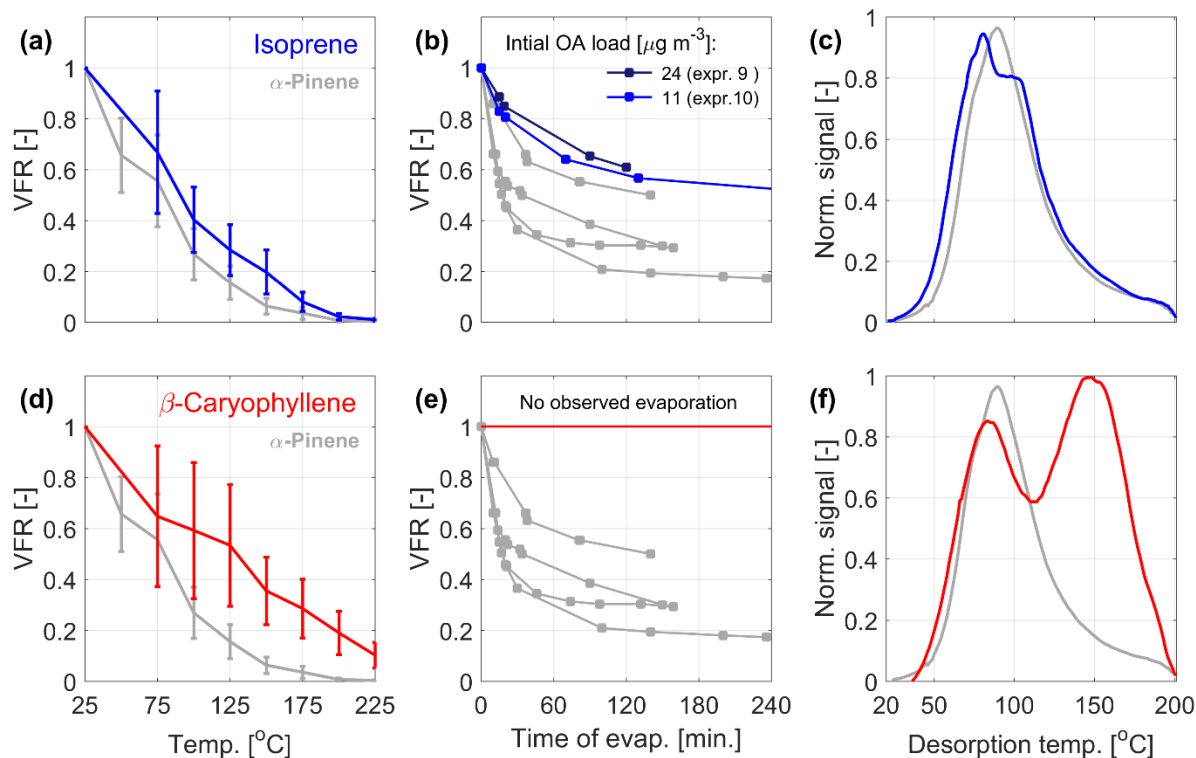

Figure 2 Measured volatility of SOA from isoprene (a-c, blue curves) and  $\beta$ -caryophyllene (d-f, red curves) oxidation by  $\text{NO}_3$ . The corresponding data from  $\alpha$ -pinene oxidation are marked in grey. The left column (a, d) presents the mean VFR evolution during the VTDMA temperature ramps, the middle column (b, e) the isothermal evaporation, and the right column (c, f) mean thermograms measured by the FIGAERO-CIMS. The VFR at room temperature (a, d) is estimated based on predicted evaporation at room temperature (b, e). For the VTDMA experiments, the VFR values correspond to the mean of three and two individual experiments for isoprene and  $\beta$ -caryophyllene, respectively (see Table 1), where the uncertainty bars correspond to the sum of the standard deviation of the VFR and the error of the two DMPS systems within the VTDMA (see Sect. 2.2.3).

### Line 374: How is thermal decomposition subtracted out? And is it not then added back in as the presumed undecomposed mass? If not, that would remove a lot of low-volatility mass from the model, I would think. That is discussed somewhat, but I'm not completely clear how it is quantitatively being handles.

The thermal decomposition subtraction is described in Wu et al. (2021). It is then not added back in because the volatility calculated based on the formula of their thermal fragmentation compounds is much higher than the thermal decomposition compounds of their parent compounds, thus it will lead to discrepancy in further calculation of the bulk volatility and the simulation of evaporation. We listed the signal fraction of the thermal decomposition compounds for each system and added some sentences in the revised manuscript to clarify this and the potential effects on results.

“It is worth noting that with the FIGAERO-CIMS, subtraction of the thermal decomposition compounds may also induce uncertainties. Thermal fragmentation contributed 5%–27%, 1%–4%, and 10%–23% of the total organic signal of the isoprene,  $\alpha$ -pinene, and  $\beta$ -caryophyllene nitrate SOA, respectively, and 3–13% for  $\alpha$ -pinene ozonolysis SOA. Since thermal decomposition due to dehydration or decarboxylation reactions normally occurs at temperatures higher than 120 °C (Buchholz, et al. 2020; Stark, et al. 2017) and the parent compounds of the decomposing molecules have an even higher thermal desorption temperature, we can conclude that the compounds we remove are of very low volatility. Unfortunately, their volatility could not be identified with the parameterization based on the formula of the thermal decomposition compounds, as they are much smaller than the parental compounds and thus have much higher volatilities. We subtracted these compounds for the further calculation of the bulk volatility and the simulation of evaporation, but we also note that it may lead to decreases in the simulated VFR in the higher temperature range (> 120 °C) in the VTDMA, thus it could be a potential reason for the discrepancies between the calculated VFR and the measured VFR with the VTDMA. In addition, as  $\alpha$ -pinene nitrate SOA exhibits much less thermal fragmentation compared to isoprene and  $\beta$ -caryophyllene, it could also explain partly the different performance of parameterization in simulating the evaporation in the VTDMA in different systems.”

**Line 387: “approach” should be plural or some other correction needs to be made**  
Change to “as well as experimental approaches”.

**SI: It would be very helpful for the authors to share their data directly. In particular, what are the formulas observed in each oxidation experiment or system? For example, for Figure RC1 above I wanted to make the figure with the actual formulas used in this work, but they were not available, so I had to use those from Isaacman-VanWertz and Aumont.**

We are very happy to share the experimental data. As mentioned above we will make it publicly available through the Bolin Centre database for the final version of the manuscript.

## References

Bannan, T. J., et al.

2019 A method for extracting calibrated volatility information from the FIGAERO-HR-ToF-CIMS and its experimental application. *Atmos. Meas. Tech.* 12(3):1429-1439.

Buchholz, A., et al.

2020 Deconvolution of FIGAERO–CIMS thermal desorption profiles using positive matrix factorisation to identify chemical and physical processes during particle evaporation. *Atmos. Chem. Phys.* 20(13):7693-7716.

Cappa, Christopher D., Edward R. Lovejoy, and A. R. Ravishankara

2007 Determination of Evaporation Rates and Vapor Pressures of Very Low Volatility Compounds: A Study of the C4–C10 and C12 Dicarboxylic Acids. *The Journal of Physical Chemistry A* 111(16):3099-3109.

Daumit, Kelly E., Sean H. Kessler, and Jesse H. Kroll

- 2013 Average chemical properties and potential formation pathways of highly oxidized organic aerosol. *Faraday Discussions* 165(0):181-202.  
Hertz, H.
- 1882 Ueber die Verdunstung der Flüssigkeiten, insbesondere des Quecksilbers, im luftleeren Raume. *Annalen der Physik* 253(10):177-193.  
Isaacman-VanWertz, G., and B. Aumont
- 2021 Impact of organic molecular structure on the estimation of atmospherically relevant physicochemical parameters. *Atmos. Chem. Phys.* 21(8):6541-6563.  
Li, Y., U. Pöschl, and M. Shiraiwa
- 2016 Molecular corridors and parameterizations of volatility in the chemical evolution of organic aerosols. *Atmos. Chem. Phys.* 16(5):3327-3344.  
Mohr, Claudia, et al.
- 2019 Molecular identification of organic vapors driving atmospheric nanoparticle growth. *Nature Communications* 10(1):4442.  
Schobesberger, S., et al.
- 2018 A model framework to retrieve thermodynamic and kinetic properties of organic aerosol from composition-resolved thermal desorption measurements. *Atmos. Chem. Phys.* 18(20):14757-14785.  
Stark, Harald, et al.
- 2017 Impact of Thermal Decomposition on Thermal Desorption Instruments: Advantage of Thermogram Analysis for Quantifying Volatility Distributions of Organic Species. *Environmental Science & Technology* 51(15):8491-8500.  
Wu, C., et al.
- 2021 Photolytically induced changes in composition and volatility of biogenic secondary organic aerosol from nitrate radical oxidation during night-to-day transition. *Atmos. Chem. Phys.* 21(19):14907-14925.
